# Supplementary material
Source: publisher site journal article supplement (https://www.dovepress.com/get_supplementary_file.php?f=407162.docx)
Supplement: Supplementary file 1 [file get_supplementary_file.php]

**Additional file 1:** The search strategy for each database

*Pubmed:*

#1 Cerebral Hemorrhage[Mesh] OR Brain Infarction[Mesh] OR Stroke[Mesh] OR Cerebrovascular Disorders[Mesh]

#2 Cerebro-vascular Disorder*[Title/Abstract] OR Intracranial Vascular Disease*[Title/Abstract] OR Intracranial Vascular Disorder*[Title/Abstract] OR Cerebro-vascular Disease*[Title/Abstract] OR Brain Vascular Disorder*[Title/Abstract] OR Cerebro-vascular Occlusion*[Title/Abstract] OR Cerebro-vascular Insufficiency[Title/Abstract] OR Cerebro-vascular Insufficiencies OR Stroke*[Title/Abstract] OR Cerebro-vascular Accident*[Title/Abstract] OR CVA*[Title/Abstract] OR Cerebro-vascular Apoplexy[Title/Abstract] OR Brain Vascular Accident*[Title/Abstract] OR Cerebro-vascular Stroke*[Title/Abstract] OR Apoplexy[Title/Abstract] OR Cerebral Stroke*[Title/Abstract] OR Acute Stroke*[Title/Abstract] OR Acute Cerebro-vascular Accident*[Title/Abstract] OR Brain Infarction*[Title/Abstract] OR Brain Infarct*[Title/Abstract] OR Anterior Circulation Brain Infarction*[Title/Abstract] OR Brain Venous Infarction*[Title/Abstract] OR Anterior Cerebral Circulation Infarction*[Title/Abstract] OR Posterior Circulation Brain Infarction*[Title/Abstract] OR Cerebrum Haemorrhag*[Title/Abstract] OR Cerebral Parenchymal Haemorrhag*[Title/Abstract] OR Intracerebral Haemorrhag*[Title/Abstract] OR Cerebral Haemorrhag*[Title/Abstract] OR Cerebral Brain Haemorrhag*[Title/Abstract]

#3 #1 OR #2

#4 Cognition Disorders[Mesh]

#5 Cognition Disorder*[Title/Abstract] OR Cognitive Impairment*[Title/Abstract] OR Cognitive Defect[Title/Abstract] OR Cognitive Dysfunction*[Title/Abstract] OR Cognitive Decline*[Title/Abstract] OR Mental Deterioration*[Title/Abstract] OR Overinclusion[Title/Abstract]

#6 #4 OR #5

#7 Acupuncture[Mesh] OR Acupuncture Therapy[Mesh] OR Meridians[Mesh]

#8 Acupuncture[Title/Abstract] OR Acupuncture Treatment*[Title/Abstract] OR Acupuncture Therapy[Title/Abstract] OR Acupuncture Therapies[Title/Abstract] OR Pharmacoacupuncture[Title/Abstract] OR Acupotomy[Title/Abstract] OR Acupotomies[Title/Abstract] OR Pharmacopuncture[Title/Abstract] OR Dry-needling[Title/Abstract] OR Body-acupuncture[Title/Abstract] OR Electroacupuncture[Title/Abstract] OR Electro-acupuncture[Title/Abstract] OR Auricular Acupuncture[Title/Abstract] OR Warm Needle[Title/Abstract] OR Meridian* [Title/Abstract] OR Ching Lo[Title/Abstract] OR Jing Luo[Title/Abstract] OR Jing mai[Title/Abstract] OR Jingluo[Title/Abstract] OR Jingmai[Title/Abstract]

#9 #7 OR #8

#10 Systematic Review[Publication Type] OR Meta-Analysis[Publication Type]

#11 Meta-Analysis as Topic[Mesh] OR Systematic Reviews as Topic[Mesh]

#12 Systematic Review as Topic[Title/Abstract] OR Systematic reviews as topic[Title/Abstract] OR Systematic Review*[Title/Abstract] OR Cochrane Review*[Title/Abstract] OR Systematic Evaluation*[Title/Abstract] OR Systematic Assessment*[Title/Abstract] OR Meta-Analysis as Topic[Title/Abstract] OR Meta Analysis as Topic[Title/Abstract] OR Meta-analytic*[Title/Abstract] OR Meta-analyses[Title/Abstract] OR Metaanalysis[Title/Abstract] OR Meta Analysis[Title/Abstract] OR Data Pooling*[Title/Abstract] OR Clinical Trial Overview*[Title/Abstract]

#13 #10 OR #11 OR #12

#14 #3 AND #6 AND #9 AND #13

*The Cochrane Library*

#1 Mesh descriptor: [Cerebrovascular Disorders] explode all trees;

#2 Mesh descriptor: [Stroke] explode all trees;

#3 Mesh descriptor: [Brain Infarction] explode all trees;

#4 Mesh descriptor: [Cerebral Hemorrhage] explode all trees;

#5 "Cerebro-vascular Disorder*":ti,ab,kw or "Intracranial Vascular Disease*":ti,ab,kw or "Intracranial Vascular Disorder*":ti,ab,kw or "Cerebro-vascular Disease*":ti,ab,kw or "Brain Vascular Disorder*":ti,ab,kw or "Cerebro-vascular Occlusion*":ti,ab,kw or "Cerebro-vascular Insufficiency":ti,ab,kw or " Cerebro-vascular Insufficiencies":ti,ab,kw or "Stroke*":ti,ab,kw or "Cerebro-vascular Accident*":ti,ab,kw or "CVA*":ti,ab,kw or "Cerebro-vascular Apoplexy":ti,ab,kw or "Brain Vascular Accident*":ti,ab,kw or "Cerebro-vascular Stroke*":ti,ab,kw or "Apoplexy":ti,ab,kw or "Cerebral Stroke*":ti,ab,kw or "Acute Stroke*":ti,ab,kw or "Acute Cerebro-vascular Accident*":ti,ab,kw or "Brain Infarction*":ti,ab,kw or "Brain Infarct*":ti,ab,kw or "Anterior Circulation Brain Infarction*":ti,ab,kw or "Brain Venous Infarction*":ti,ab,kw or "Anterior Cerebral Circulation Infarction*":ti,ab,kw or "Posterior Circulation Brain Infarction*":ti,ab,kw or "Cerebrum Haemorrhag*":ti,ab,kw or "Cerebral Parenchymal Haemorrhag*":ti,ab,kw or "Intracerebral Haemorrhag*":ti,ab,kw or "Cerebral Haemorrhag*":ti,ab,kw or "Cerebral Brain Haemorrhag*":ti,ab,kw (Word variations have been searched)

#6 #1 or #2 or #3 or #4 or #5

#7 Mesh descriptor: [Cognition Disorders] explode all trees;

#8 "Cognition Disorder*":ti,ab,kw or "Cognitive Impairment*":ti,ab,kw or "Cognitive Defect":ti,ab,kw or "Cognitive Dysfunction*":ti,ab,kw or "Cognitive Decline*":ti,ab,kw or "Mental Deterioration*":ti,ab,kw or "Overinclusion":ti,ab,kw(Word variations have been searched)

#9 #7 or #8

#10 Mesh descriptor: [Acupuncture] explode all trees;

#11 Mesh descriptor: [Acupuncture Therapy] explode all trees;

#12 Mesh descriptor: [Meridians] explode all trees;

#13 "Acupuncture":ti,ab,kw or "Acupuncture Treatment*":ti,ab,kw or "Acupuncture Therapy":ti,ab,kw or "Acupuncture Therapies":ti,ab,kw or "Pharmacoacupuncture":ti,ab,kw or "Acupotomy":ti,ab,kw or "Acupotomies":ti,ab,kw or "Pharmacopuncture":ti,ab,kw or "Dry-needling":ti,ab,kw or "Body-acupuncture":ti,ab,kw or "Electroacupuncture":ti,ab,kw or "Electro-acupuncture":ti,ab,kw or "Auricular Acupuncture":ti,ab,kw or "Warm Needle":ti,ab,kw or "Meridian*":ti,ab,kw or "Ching Lo":ti,ab,kw or "Jing Luo":ti,ab,kw or "Jing mai":ti,ab,kw or "Jingluo":ti,ab,kw or "Jingmai":ti,ab,kw (Word variations have been searched)

#14 #10 OR #11 OR #12 OR #13

#15 Mesh descriptor: [Meta-Analysis as Topic] explode all trees;

#16 Mesh descriptor: [Systematic Reviews as Topic] explode all trees;

#17 "Systematic Review as Topic":ti,ab,kw or "Systematic reviews as topic":ti,ab,kw or "Systematic Review*":ti,ab,kw" or "Systematic Evaluation*":ti,ab,kw" or "Systematic Assessment*":ti,ab,kw" or "Cochrane Review*":ti,ab,kw" or "Meta-Analysis as Topic":ti,ab,kw or "Meta Analysis as Topic":ti,ab,kw or "Meta-analytic*":ti,ab,kw or "Meta-analyses":ti,ab,kw or "metaanalysis":ti,ab,kw or "Meta Analysis":ti,ab,kw or "Data Pooling*":ti,ab,kw or "Clinical Trial Overview*":ti,ab,kw (Word variations have been searched)

#18 #15 OR #16 OR #17

#19 #6 AND #9 AND #14 AND #18

*Embase*

***#*** 1 'Cerebrovascular Disease'/exp OR 'Stroke Patient '/exp OR 'Brain Infarction '/exp OR 'brain hemorrhage'/exp

#2 'Cerebro-vascular Disorder*':ab,ti OR 'Intracranial Vascular Disease*':ab,ti OR 'Intracranial Vascular Disorder*':ab,ti OR 'Cerebro-vascular Disease*':ab,ti OR 'Brain Vascular Disorder*':ab,ti OR 'Cerebro-vascular Occlusion*':ab,ti OR 'Cerebro-vascular Insufficiency':ab,ti OR 'Cerebro-vascular Insufficiencies':ab,ti OR 'Stroke*':ab,ti OR 'Cerebro-vascular Accident*':ab,ti OR 'CVA*':ab,ti OR 'Cerebro-vascular Apoplexy':ab,ti OR 'Brain Vascular Accident*':ab,ti OR 'Cerebro-vascular Stroke*':ab,ti OR 'Apoplexy':ab,ti OR 'Cerebral Stroke*':ab,ti OR 'Acute Stroke*':ab,ti OR 'Acute Cerebro-vascular Accident*':ab,ti OR 'Brain Infarction*':ab,ti OR 'Brain Infarct*':ab,ti OR 'Anterior Circulation Brain Infarction*':ab,ti OR 'Brain Venous Infarction*':ab,ti OR 'Anterior Cerebral Circulation Infarction*':ab,ti OR 'Posterior Circulation Brain Infarction*':ab,ti OR 'Cerebrum Haemorrhag*':ab,ti OR 'Cerebral Parenchymal Haemorrhag*':ab,ti OR 'Intracerebral Haemorrhag*':ab,ti OR 'Cerebral Haemorrhag*':ab,ti OR 'Cerebral Brain Haemorrhag*':ab,ti

#3 #1 OR #2

***#***4 'Cognitive Defect'/exp

#5 'Cognitive Defect':ab,ti OR 'Cognition Disorder*':ab,ti OR 'Cognitive Impairment*':ab,ti OR 'Cognitive Dysfunction*':ab,ti OR 'Cognitive Decline*':ab,ti OR 'Mental Deterioration*':ab,ti OR 'Overinclusion':ab,ti

#6 #4 OR #5

#7 'Acupuncture'/exp

#8 'Acupuncture':ab,ti OR 'Acupuncture Treatment*':ab,ti OR 'Acupuncture Therapy':ab,ti OR 'Acupuncture Therapies':ab,ti OR 'Pharmacoacupuncture':ab,ti OR 'Acupotomy':ab,ti OR 'Acupotomies':ab,ti OR 'Pharmacopuncture':ab,ti OR 'Dry-needling':ab,ti OR 'Body-acupuncture':ab,ti OR 'Electroacupuncture':ab,ti OR 'Electro-acupuncture':ab,ti OR 'Auricular Acupuncture':ab,ti OR 'Warm Needle':ab,ti OR 'Meridian*':ab,ti OR 'Ching Lo':ab,ti OR 'Jing Luo':ab,ti OR 'Jing mai':ab,ti OR 'Jingluo':ab,ti OR 'Jingmai':ab,ti

#9 #7 OR #8

#10 'Meta analysis'/exp OR 'Meta analysis (topic) '/exp OR 'Systematic review'/exp OR 'Systematic review (topic) '/exp

#11 'Systematic Review as Topic':ab,ti OR 'Systematic reviews as topic':ab,ti OR 'Systematic Review*':ab,ti OR 'Systematic Evaluation*':ab,ti OR 'Systematic Assessment*':ab,ti OR 'Cochrane Review*':ab,ti OR 'Meta-Analysis as Topic':ab,ti OR 'Meta Analysis as Topic':ab,ti OR 'Meta-analytic*':ab,ti OR 'Meta-analyses':ab,ti OR 'metaanalysis':ab,ti OR 'Meta Analysis':ab,ti OR 'Data Pooling*':ab,ti OR 'Clinical Trial Overview*':ab,ti

#12 #10 or #11

#13 #3AND #6 AND #9 AND #12

*Web of Science*

TS=(‘Cerebro-vascular Disorder*’ OR ‘Intracranial Vascular Disease*’ OR ‘Intracranial Vascular Disorder*’ OR ‘Cerebro-vascular Disease*’ OR ‘Brain Vascular Disorder*’ OR ‘Cerebro-vascular Occlusion*’ OR ‘Cerebro-vascular Insufficiency’ OR ‘Cerebro-vascular Insufficiencies’ OR ‘Stroke*’ OR ‘Cerebro-vascular Accident*’ OR ‘CVA*’ OR ‘Cerebro-vascular Apoplexy’ OR ‘Brain Vascular Accident*’ OR ‘Cerebro-vascular Stroke*’ OR ‘Apoplexy’ OR ‘Cerebral Stroke*’ OR ‘Acute Stroke*’ OR ‘Acute Cerebro-vascular Accident*’ OR ‘Brain Infarction*’ OR ‘Brain Infarct*’ OR ‘Anterior Circulation Brain Infarction*’ OR ‘Brain Venous Infarction*’ OR ‘Anterior Cerebral Circulation Infarction*’ OR ‘Posterior Circulation Brain Infarction*’ OR ‘Cerebrum Haemorrhag*’ OR ‘Cerebral Parenchymal Haemorrhag*’ OR ‘Intracerebral Haemorrhag*’ OR ‘Cerebral Haemorrhag*’ OR ‘Cerebral Brain Haemorrhag*’) AND TS=(‘Cognition Disorder*’ OR ‘Overinclusion’ OR ‘Cognitive Impairment*’ OR ‘Cognitive Defect’ OR ‘Cognitive Dysfunction*’ OR ‘Cognitive Decline*’ OR ‘Mental Deterioration*’) AND TS=(‘Acupuncture’ OR ‘Acupuncture Treatment*’ OR ‘Acupuncture Therapy’ OR ‘Acupuncture Therapies’ OR ‘Pharmacoacupuncture’ OR ‘Acupotomy’ OR ‘Acupotomies’ OR ‘Pharmacopuncture’ OR ‘Dry-needling’ OR ‘Body-acupuncture’ OR ‘Electroacupuncture’ OR ‘Electro-acupuncture’ OR ‘Auricular Acupuncture’ OR ‘Warm Needle’ OR ‘Meridian*’ OR ‘Ching Lo’ OR ‘Jing Luo’ OR ‘jing mai’ OR ‘Jingluo’ OR ‘jingmai’) AND TS=(‘Systematic Review as Topic’ OR ‘Systematic reviews as topic’ OR ‘Systematic Review*’ OR ‘Systematic Evaluation*’ OR ‘Systematic Assessment*’ OR ‘Cochrane Review*’ OR ‘Meta-Analysis as Topic’ OR ‘Meta Analysis as Topic’ OR ‘Meta-analytic*’ OR ‘Meta-analyses’ OR ‘Metaanalysis’ OR ‘Meta Analysis’ OR ‘Data Pooling*’ OR ‘Clinical Trial Overview*’)

*China National Knowledge Infrastructure*

SU=('中风' +'卒中'+'脑出血'+'脑梗塞'+'脑梗死'+'脑栓塞'+'脑血栓'+'脑血管病'+'脑血管障碍') AND SU=('认知障碍'+'痴呆') AND SU=('针刺'+'针灸'+'耳针'+'体针'+'舌针'+'电针'+'温针灸'+'腹针'+'头针'+'穴位'+'经络'+'经脉') AND SU=('荟萃分析'+'系统综述'+'系统评价'+'Meta分析')

*Wanfang Database*

(中风 or 卒中 or 脑出血 or 脑梗塞or脑梗死 or脑栓塞or脑血栓 or脑血管病or 脑血管障碍) and (认知障碍 or 痴呆) and (针刺 or 针灸or耳针or体针or舌针or电针or温针灸or腹针or头针or 穴位or经络 or 经脉) and (荟萃分析 or 系统综述 or 系统评价 or Meta分析)

*Chongqing VIP*

(U=中风 OR U=卒中 OR U=脑出血 OR U=脑梗死 OR U=脑梗塞 OR U=脑栓塞 OR U=脑血栓 OR U=脑血管病 OR U=脑血管障碍) AND (U=认知障碍 OR U=痴呆) AND (U=针刺 OR U=针灸 OR U=耳针 OR U=体针 OR U=舌针 OR U=电针 OR U=温针灸 OR U=腹针 OR U=头针 OR U=穴位 OR U=经络 OR U=经脉) AND (U=荟萃分析 OR U=系统综述 OR U=系统评价 OR U=Meta分析)

*Sino-Med*

1 "中风"[不加权:扩展]

2 "卒中"[不加权:扩展]

3 "脑血管障碍"[不加权:扩展]

4 "脑梗死"[不加权:扩展]

5 "脑出血"[不加权:扩展]

6 "中风"[常用字段:智能] OR "卒中"[常用字段] OR "脑梗死"[常用字段:智能] OR "脑梗塞"[常用字段:智能] OR "脑栓塞"[常用字段:智能] OR "脑血栓"[常用字段:智能] OR "脑出血"[常用字段:智能] OR "脑血管障碍"[常用字段:智能] OR "脑血管病"[常用字段:智能]

7 (#1) OR (#2) OR (#3) OR (#4) OR (#5) OR (#6)

8 "认知障碍"[不加权:扩展]

9 "痴呆"[不加权:扩展]

10 "认知障碍"[常用字段:智能] OR "痴呆"[常用字段]

11 (#8) OR (#9) OR (#10)

12 "针刺疗法"[不加权:扩展]

13 "针刺"[不加权:扩展]

14 "针灸疗法"[不加权:扩展]

15 "针刺"[常用字段:智能] OR "针灸"[常用字段:智能] OR "耳针"[常用字段:智能] OR "电针"[常用字段:智能] OR "体针"[常用字段:智能] OR "舌针"[常用字段:智能] OR "温针灸"[常用字段:智能] OR "头针"[常用字段:智能] OR "腹针"[常用字段:智能] OR "穴位"[常用字段:智能] OR "经脉"[常用字段:智能] OR "经络"[常用字段:智能]

16 (#12) OR (#13) OR (#14) OR (#15)

17 "Meta分析"[不加权:扩展]

18 "Meta分析"[常用字段:智能] OR "系统评价"[常用字段:智能] OR "荟萃分析"[常用字段:智能] OR "系统综述"[常用字段:智能]

19 (#17) OR (#18)

20 (#7) AND (#11) AND (#16) AND (#19)

**Additional file 2:** The 16 items of AMSTAR-2

Q1: Did the research questions and inclusion criteria for the review include the components of PICO?

Q2: Did the report of the review contain an explicit statement that the review methods were established prior to the conduct of the review and did the report justify any significant deviations from the protocol?

Q3: Did the review authors explain their selection of the study designs for inclusion in the review?

Q4: Did the review authors use a comprehensive literature search strategy?

Q5: Did the review authors perform study selection in duplicate?

Q6: Did the review authors perform data extraction in duplicate?

Q7: Did the review authors provide a list of excluded studies and justify the exclusions?

Q8: Did the review authors describe the included studies in adequate detail? Q9: Did the review authors use a satisfactory technique for assessing the risk of bias (RoB) in individual studies that were included in the review?

Q10: Did the review authors report on the sources of funding for the studies included in the review?

Q11: If meta-analysis was performed did the review authors use appropriate methods for statistical combination of results?

Q12: If meta-analysis was performed, did the review authors assess the potential impact of RoB in individual studies on the results of the meta-analysis or other evidence synthesis?

Q13: Did the review authors account for RoB in individual studies when interpreting/discussing the results of the review?

Q14: Did the review authors provide a satisfactory explanation for, and discussion of, any heterogeneity observed in the results of the review?

Q15: If they performed quantitative synthesis, did the review authors carry out an adequate investigation of publication bias (small study bias) and discuss its likely impact on the results of the review?

Q16: Did the review authors report any potential sources of conflict of interest, including any funding they received for conducting the review.
